## Review Article

# Establishment, maintenance, and biological roles of non-CG methylation in plants

Sunil K. Kenchanmane Raju<sup>1</sup>, Eleanore Jeanne Ritter<sup>1</sup> and  Chad E. Niederhuth<sup>1,2</sup>

<sup>1</sup>Department of Plant Biology, Michigan State University, East Lansing, MI 48824, U.S.A.; <sup>2</sup>AgBioResearch, Michigan State University, East Lansing, MI 48824, U.S.A.

**Correspondence:** Chad E. Niederhuth (niederhu@msu.edu)

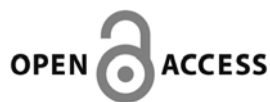

Cytosine DNA methylation is prevalent throughout eukaryotes and prokaryotes. While most commonly thought of as being localized to dinucleotide CpG sites, non-CG sites can also be modified. Such non-CG methylation is widespread in plants, occurring at trinucleotide CHG and CHH (H = A, T, or C) sequence contexts. The prevalence of non-CG methylation in plants is due to the plant-specific CHROMOMETHYLASE (CMT) and RNA-directed DNA Methylation (RdDM) pathways. These pathways have evolved through multiple rounds of gene duplication and gene loss, generating epigenomic variation both within and between species. They regulate both transposable elements and genes, ensure genome integrity, and ultimately influence development and environmental responses. In these capacities, non-CG methylation influence and shape plant genomes.

## Introduction

Methylation of cytosines is a widespread modification of DNA and is found across both eukaryotes [1,2] and prokaryotes [3]. Because it is a modification of DNA itself, it can persist through both mitosis and meiosis, facilitating its own replication. In eukaryotes, DNA methylation plays critical roles in diverse biological processes, but notably, it is associated with gene and transposon silencing [1,4]. DNA methylation in plants is distinct from mammals, having a fractionated pattern where methylation is predominantly found outside of genic regions [5]. They also differ in underlying sequence contexts. Methylation of cytosines in the dinucleotide CpG (CG) context is found throughout plants, animals, and fungi. Maintenance across these diverse taxa is carried out by the highly conserved DNA METHYLTRANSFERASE 1 (DNMT1), also called METHYLTRANSFERASE 1 (MET1) in plants [6]. In 1981 it was shown that DNA methylation in plants can be found at symmetrical trinucleotide CHG sites (H = A, C, or T) [7] and later in 1994 it was found to also occur at asymmetrical trinucleotide CHH sites [8]. Recently, non-CG methylation has been found in specific cell-types in humans and mice [9,10] (e.g. embryonic stem cells [10] and brain [11,12]) and may be important during differentiation [13]. The prevalence of non-CG methylation in plants is due to several plant-specific pathways and enzymes. These involve either the CHROMOMETHYLASE (CMT) family of DNA methyltransferases or the RNA-directed DNA Methylation (RdDM) pathway [14–18]. Here we review the mechanisms, evolution, and biological roles of non-CG methylation in plants.

## CMTs

CMTs are cytosine methyltransferases characterized by the presence of a bromo-adjacent homology (BAH) and a CHROMatin Organization MODifier (CHROMO) domain between the cytosine methyltransferase catalytic motifs I and IV [19,20]. Some homologous sequences in green algae, however, lack the CHROMO domain [21]. Phylogenetically, CMTs can be separated into CMT1, CMT2, CMT3, ZMETs (ZEA METHYLTRANSFERASE), and the homologous CMTs (hCMT)  $\alpha/\beta$  (Figure 1A). This last group, hCMT $\alpha/\beta$ , are found in non-angiosperms. A duplication event at the base of the angiosperms, prior to the divergence of monocots and eudicots, gave rise to CMT2 and the

Received: 14 August 2019  
Revised: 18 September 2019  
Accepted: 20 September 2019

Version of Record published:  
11 October 2019

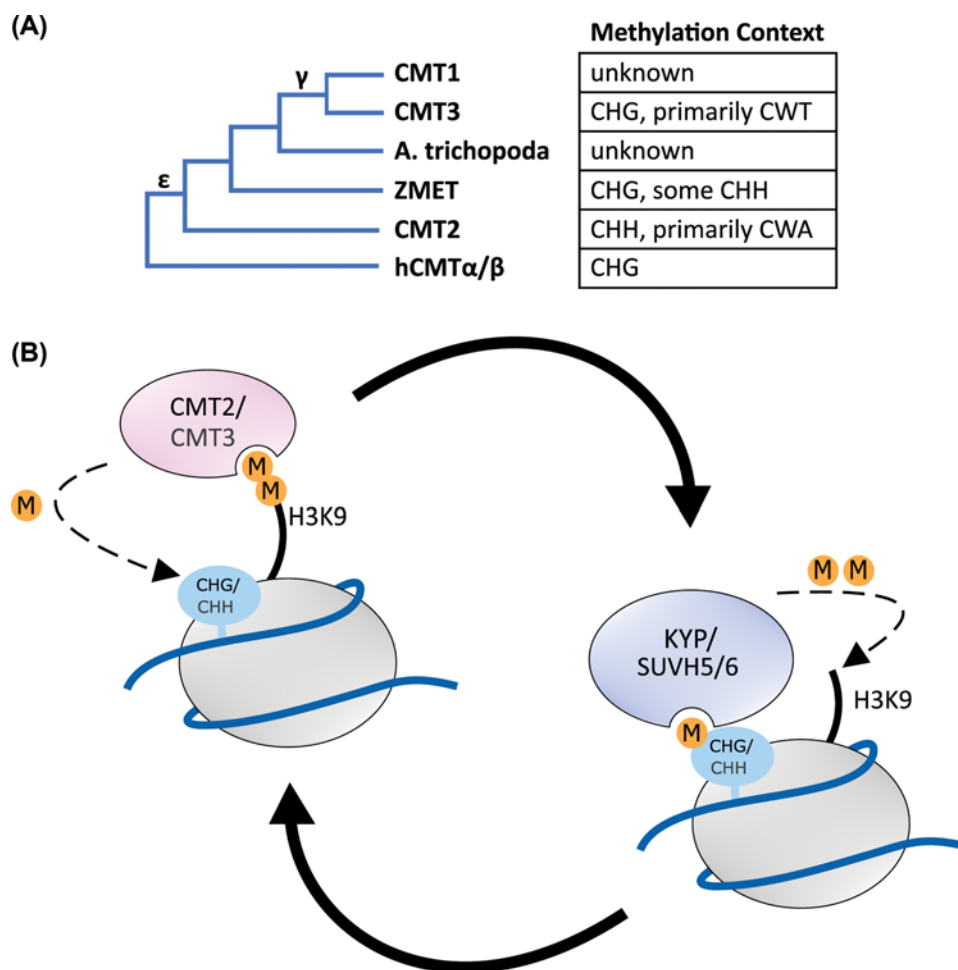

**Figure 1. Phylogeny and targeting of CMT proteins**

(A) Phylogenetic tree showing different clades of the CMT family and the sequence contexts that they methylate. (B) CMT proteins bind H3K9me2, where it methylates target sequences. The histone methyltransferases KYP/SUVH5/SUVH6 in turn bind methylated non-CG sites, where it di-methylates H3K9 residues. In this way, CMT proteins and KYP/SUVH5/SUVH6 establish a positive feedback loop for the establishment and maintenance of regions of constitutive heterochromatin.

clade that includes CMT1, CMT3, and ZMET. *Amborella trichopoda*, which is sister to all flowering plants, has a CMT2 gene and one CMT sister to CMT1/CMT3/ZMETs. ZMETs, named in reference to work from *Zea mays* [22], form a monophyletic group containing monocots, monocots/commelinids, and magnoliids [21]. In eudicots, a further duplication, perhaps the  $\gamma$  whole-genome duplication event, gave rise to CMT1 and CMT3 [21].

In *Arabidopsis thaliana*, CMT2 and CMT3 have different sequence preferences. CMT2 targets CHH sites [18], however recent work suggests greater specificity, preferentially methylating CAA/CTA in *A. thaliana* and CAA/CAT in *Solanum lycopersicum* [23,24]. CMT3 targets CHG [15,22], but preference may be given to CAG/CTG, as CCG methylation is typically lower in heterochromatin. CMT1 has not been studied outside of *A. thaliana* and is generally considered dispensable in *A. thaliana*, as many ecotypes contain alleles of *CMT1* resulting in a truncated protein and do not display any apparent effects on DNA methylation [19,25]. The ZMETs function much like CMT3 in CHG methylation and mutants in both *Z. mays* and *Oryza sativa* have a number of developmental defects [22,26]. Interestingly, in *Z. mays*, ZMET2 also appears to methylate CHH at some loci [23,24]. The moss *Physcomitrella patens* has a single CMT gene which falls in the hCMTα/β clade, and based on Ppcmt mutants, functions in CHG methylation [27].

The BAH and CHROMO domains of CMT2 and CMT3 recognize H3K9me2 containing nucleosomes and target these regions for DNA methylation [14,28,29] (Figure 1B). In *A. thaliana*, H3K9me2 is established by H3K9 methyltransferases SUPPRESSOR OF VARIATION 3-9 HOMOLOGs: KRYPTONITE (KYP or SUVH4), SUVH5, and

SUVH6 [30,31]. These proteins bind methylated DNA (Figure 1B) via a SET and RING finger associated (SRA) domain and methylate H3K9 [32,33]. Thus, non-CG methylation and H3K9me2 form a self-reinforcing feedback loop to establish regions of constitutive heterochromatin [34]. Interestingly, KYP appears to have little affinity for CCG methylation, which may in part explain the observed lower levels of methylation at heterochromatic CCG sites [23,35].

CMT3 appears to also have a role in establishing a unique pattern of CG-only DNA methylation found in many expressed genes, referred to as gene-body methylation (gbM) [36]. Links to CMT3 were discovered when two Brassicaceae species, *Eutrema salsugineum* and *Conringia planisilqua*, were found to have independently lost both CMT3 and gbM [36]. This association between presence/absence of CMT3 and gbM is observed throughout plants [21,37]. However, as CMT3 primarily methylates CHG sites and not CG sites, this relationship was unexpected. Further experimental evidence was recently provided by transgenic expression of *A. thaliana* CMT3 in *E. salsugineum*. This resulted in *AtCMT3*-expression dependent CHG methylation, followed by CG and CHH methylation, over a subset of actively transcribed genes orthologous to *A. thaliana* gbM genes. CG methylation was preferentially retained and inherited relative to CHG and CHH methylation following loss of *AtCMT3* expression [38]. It is not yet clear mechanistically how CMT3 triggers the accumulation of CG methylation in gene bodies, but it is clearly necessary for its initiation, even if not its maintenance. While there is no evident function for gbM, elevated CG-TG substitution rates were found associated with CMT3 and gbM in Brassicaceae species, indicating that it can still have evolutionary consequences [37].

## Canonical RdDM

First discovered in viroid-infected tobacco [39], the RdDM pathway has evolved in plants as a method for targeted DNA methylation via 24-nucleotide (nt) small interfering RNAs (siRNAs) [40]. RdDM can methylate all sequence contexts (CG, CHG, and CHH), however, it is often associated with CHH methylation. RdDM couples the action of the plant-specific RNA polymerases IV and V (Pol IV and Pol V), with components of or related to those of RNAi, such as DICER-LIKE (DCL) and ARGONAUTE (AGO) proteins [40,41] (Figure 2A). Canonical RdDM can be broadly divided into two steps. The first involves the biogenesis of 24-nt siRNAs by Pol IV. Pol IV can be recruited to some target sites by SAWADEE HOMEODOMAIN HOMOLOGUE 1 (SHH1) [41,42] and CLASSY (CLSY) proteins [43–45], the latter appearing to be key locus-specific regulators of RdDM [45]. Pol IV then transcribes 30 to 40-nt single-stranded RNAs (ssRNAs) [46,47], which are subsequently copied by RNA-DEPENDENT RNA POLYMERASE 2 (RDR2) to generate double-stranded RNA (dsRNA) [48]. DICER-LIKE PROTEIN 3 (DCL3) then cleaves the dsRNAs to 24-nt siRNAs [47].

The second step of canonical RdDM is Pol V-mediated *de novo* methylation. Here, Pol V is recruited to target loci by the SU(VAR)3-9 homologs SUVH2 and SUVH9, which bind to methylated DNA [49]. Pol V then transcribes a class of long non-coding RNAs, thought to serve as scaffolds for RdDM targeting [50]. During this step, either AGO4 or AGO6 binds 24-nt siRNAs [51] and are recruited to Pol V by interaction with the largest subunit of Pol V and KOW DOMAIN-CONTAINING TRANSCRIPTION FACTOR 1 [52,53]. The 24-nt siRNAs can then pair with nascent scaffold RNAs produced by Pol V [54,55]. AGO4/AGO6 then recruits DOMAINS REARRANGED METHYLTRANSFERASE 2 (DRM2), a homolog of mammalian DNMT3, to catalyze DNA methylation. It is thought that RNA-DIRECTED DNA METHYLATION 1 (RDM1) may assist in the AGO4–DRM2 interaction, however, its role remains unclear [55].

Many of the proteins involved in RdDM arose through gene duplication, and subsequent sub and neofunctionalization [56,57]. Some key components have only been found in angiosperms [58,59]. For instance, Pol IV and V evolved from duplication of various subunits of Pol II [57,58], and there is evidence of further lineage-specific duplication and evolution of a putative Pol VI in grasses [60]. From an evolutionary perspective, RdDM is a powerful example of how novelty and complexity can arise through gene duplication.

## Non-canonical RdDM

Multiple ‘non-canonical’ variations of the RdDM pathway exist in plants [40,61] (Figure 2B). All identified to date require Pol V and DRM2, differing primarily in the source and production of small RNAs involved. These non-canonical pathways provide alternative sources and entry points for small RNAs into RdDM and potentially solve the mystery of how *de novo* silencing of transcriptionally active TEs is initiated [62,63]. Notably, many of the small RNAs in these pathways are derived from Pol II transcription instead of Pol IV and are facilitated by overlaps and similarities in the components of RdDM and post-transcriptional gene silencing (PTGS) [61]. There is a competitive hierarchy among different DCL proteins involved in both RdDM (DCL3, producing 24-nt small RNAs) and PTGS (DCL1/DCL2/DCL4, producing 21–22-nt small RNAs) for Pol II transcripts [64]. For example, two non-canonical

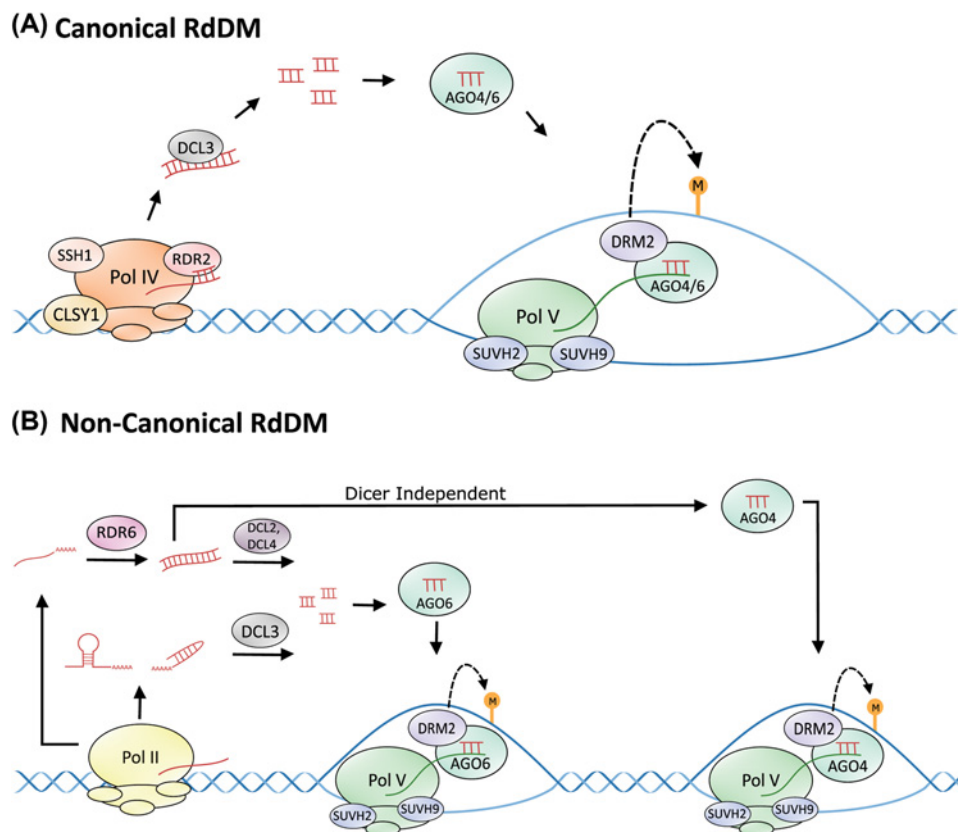

**Figure 2. Canonical RdDM and non-canonical RdDM in plants**

**(A)** Pol IV transcribes 30–40-nt ssRNAs from target loci. At some loci, recruitment of Pol IV is determined by CLSY1 and SSH. RDR2 generates dsRNAs from the Pol IV ssRNAs, which are then cleaved by DCL3 into 24-nt siRNAs. These 24-nt siRNAs bind to AGO4 or AGO6 and pair with nascent RNAs produced by Pol V, which is recruited to target sites by SUVH2 and SUVH9. DRM2 is then recruited by AGO4/AGO6 to catalyze DNA methylation. **(B)** Pol II transcripts that form dsRNA through hairpin loops can be cleaved by DCL3. Alternatively, Pol II ssRNAs can be copied by RDR6 to form dsRNAs and then cleaved by DCL2 and DCL4. Both these pathways feed into AGO6 to facilitate RdDM. In the dicer-independent pathway, dsRNAs produced by RDR6 can directly bind to AGO4 and be cleaved to their proper size by exonucleases to facilitate RdDM.

pathways, Pol II-DCL3 RdDM, and microRNA (miRNA)-directed DNA methylation make use of Pol II transcribed inverted repeats or miRNA precursors (respectively). These are cleaved by DCL3, rather than DCL1/DCL2/DCL4, to produce 24-nt siRNAs which then feed directly into the canonical downstream pathway [61,65,66].

Two other pathways derive siRNAs from PTGS through the action of RNA-DEPENDENT RNA POLYMERASE 6 (RDR6) [63,67,68]. In RDR6 RdDM, certain Pol II-transcribed mRNAs, such as those from the non-protein-coding TAS loci or transcriptionally activated TEs, are targeted and cleaved by PTGS. SsRNA derived from these cleaved mRNAs is converted into dsRNA by RDR6 and then processed by DCL2/DCL4 into 21–22-nt secondary siRNAs. These can be directly loaded on to AGO6 for RdDM [63]. Alternatively, in RDR6-DCL3 RdDM, RDR6-derived dsRNA is cleaved by DCL3 into 24-nt siRNAs and fed into Pol V-mediated RdDM [68]. A dicer-independent pathway has also been observed, where a non-diced dsRNA from either Pol II-RDR6 or Pol IV-RDR2 is directly loaded on to AGO4. Exonucleases from the exosome core complex then trim the RNA to 21–24 nt and are then used in Pol V-mediated RdDM [69].

## Biological roles of non-CG methylation Transposons

Transposable elements (TEs) encompass a large portion of most plant genomes [70,71] and can be mutagenic [72]. Limiting TE activity is critical for cells and the chromatin environment is the primary means of defense. Generally, TEs are silenced by the complementary action of DNA methylation (Figure 3A) and histone modification [73]. Temporary



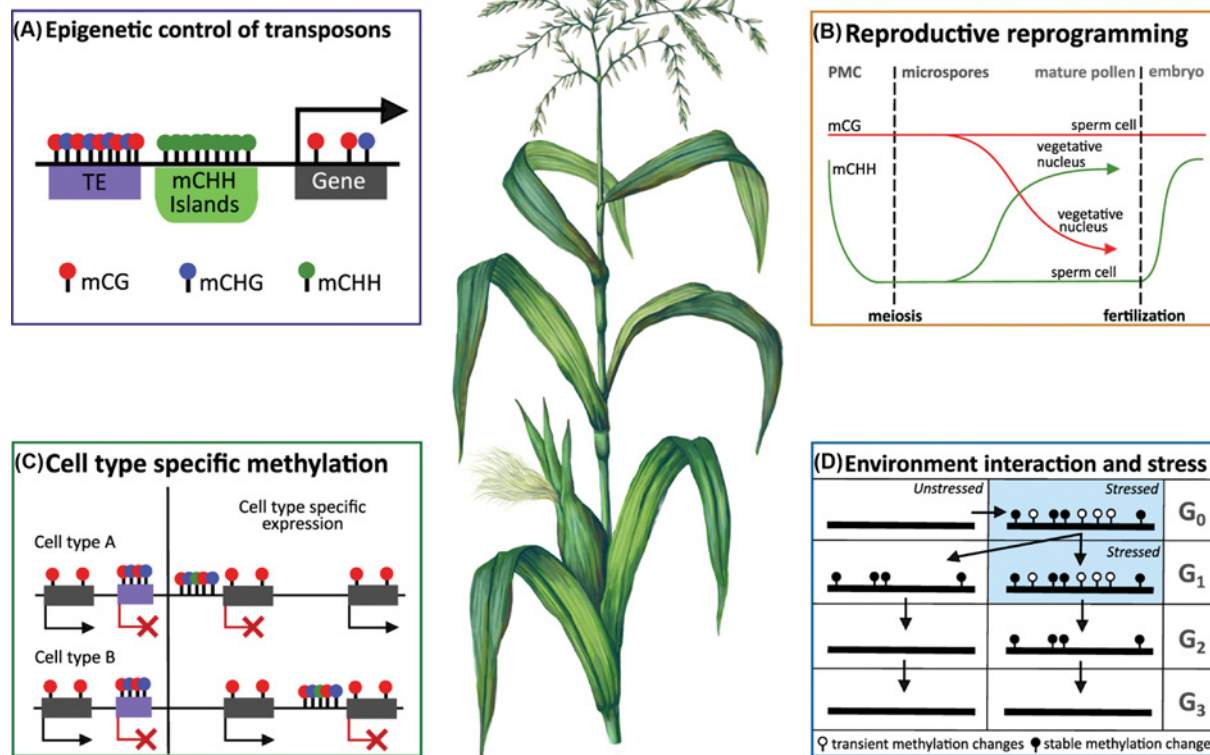

**Figure 3. Biological roles of non-CG methylation in plants**

(A) Non-CG methylation has a major function in the silencing of TEs. In euchromatic regions, these are often bordered by regions of high CHH methylation, known as CHH islands. These potentially form barriers between regions of heterochromatin and neighboring genes. (B) DNA methylation reprogramming in the pollen. Pollen Mother Cells (PMCs) have high levels of CG and CHH methylation. After meiosis, microspores lose CHH methylation while CG methylation levels remain high. Sperm nuclei retain high levels of methylation while vegetative nuclei lose CG methylation and gain CHH methylation. After fertilization, the embryo maintains higher CG methylation, and CHH methylation gradually increases. (C) Cell-type specific DNA methylation patterns affecting gene expression. While the majority of genes and transposable elements have similar levels of methylation and expression across cell-types, differential DNA methylation changes may lead to cell-type/tissue-specific gene expression changes. (D) Stress-induced DNA methylation changes during biotic and abiotic stresses. A subset of stress-induced methylation changes can be passed on to the progeny. One generation without stress is enough to erase most of the stress-induced DNA methylation changes (stress memory) and nearly all stress memory is erased by the second generation without stress.

loss of DNA methylation and subsequent reactivation of TEs, as during stress-induced bursts of TEs, can be a source of novel genetic variation in plant evolution [74,75]. The specific DNA methylation pathways targeting TEs vary with context, depending on whether the TE is found near genes or in regions of constitutive heterochromatin. Nearly all TE methylation in *A. thaliana* results from either DECREASE IN DNA METHYLATION 1 (DDM1) or RdDM. DDM1 encodes a SWI2/SNF2-like protein which alters chromatin architecture and allows DNA methyltransferases, like the CMTs, access to heterochromatic regions [76–78]. DDM1 appears to primarily affect DNA methylation in constitutive heterochromatic regions where RdDM is less active [18]. The RdDM pathway commonly targets short TEs in euchromatic regions [79] and on the edges of heterochromatic long TEs. It is essential for RdDM to re-silence TEs with each round of replication, especially near genes. While the two pathways have their preferred targets, there is a degree of cooperation between pathways as evidenced by various DNA methylation mutants [18].

TEs and TE methylation can be a source of hidden variation that conditionally affect the proper expression of nearby genes [80]. Non-CG methylation is often critical to protecting genes from neighboring TEs. For example, *KARMA* is a TE insertion in the intron of the homeotic gene *DEFECIENS* in *Elaeis guineensis*. CHG hypomethylation near the splice site of *KARMA*, induced at high-frequency during tissue culture, causes mutants displaying mantling with pronounced yield loss [81]. Originally identified in *Z. mays*, CHH islands are regions of high CHH

methylation at euchromatin/heterochromatin borders and have been proposed to reinforce TE silencing by creating boundaries between highly methylated (CG and CHG), silenced chromatin of the TE and active chromatin of the adjacent gene [82,83] (Figure 3A). CHH islands may have a more direct role in mitigating the adverse effects of neighboring TEs on gene expression. In *A. thaliana*, it was shown that SUVH1 and SUVH3 bind methylated cytosines in regions of high CHH methylation adjacent to genes and interact with two DNAJ domain-containing homologs, DNAJ1 and DNAJ2, to negate the effects of TEs on gene expression [84].

## Reproduction and development

DNA methylation plays a vital role in plant reproductive processes [85,86]. A lot of confusion comes from imposing models of mammalian reproduction and development on plants. Key differences exist that should caution against this. During plant gametogenesis, adult somatic cells undergo meiosis to produce haploid microspores (male) or megaspores (female) which then differentiate into male (sperm cells) and female (egg cells) gametophytes [85–87]. DNA methylation during these steps differs greatly from those seen in animals. Plant germlines never fully erase DNA methylation, instead often reinforcing DNA methylation states, while animals show complete reprogramming [87,88]. This may be due to the fact that the germline of animals is defined during embryogenesis and before meiosis takes place [87].

In *A. thaliana*, the male meiocyte, which undergoes meiosis to give rise to the haploid microspores, retains CG and CHG methylation in transposons while losing most of its CHH methylation (Figure 3B). However, *de novo* CHH methylation is acquired at specific loci, such as the last intron of *MULTIPOLAR SPINDLE 1* (*MPS1*). This is essential for correct splicing of *MPS1* and proper meiosis of the meiocytes [89]. The microspores and sperm cells retain CG and CHG methylation while losing CHH methylation, the latter correlating with low DRM2 expression. In contrast, the vegetative nucleus (VN), a non-reproductive companion cell in pollen, gains CHH methylation (Figure 3B). At the same time, there is extensive demethylation of many sites and reactivation of TEs in the VN [86,87]. Changes in VN DNA methylation and TE activity are due in part to a coordination of shutting down DNA methylation maintenance and promoting demethylation. Specifically, DDM1 is not expressed in the VN [90], while the DNA glycosylases DEMETER (DME) [79] and REPRESSOR OF SILENCING 1 (ROS1) [91], which excise 5-methylcytosine from DNA, are active. This demethylation leads to reactivation of TEs, which produce small RNAs capable of initiating targeted silencing in the gametes. This has been proposed as a means of reinforcing TE silencing in the germline [87,90]. Additionally, many silenced genes are re-expressed and these may have a role in promoting pollen development [92]. Like the male germline, CG methylation is retained during female gametogenesis, but CG methylation levels do decrease in the egg cell specifically. CHH methylation is reduced during sporogenesis, whereas it is stable during gametogenesis and in the egg cell [85]. Fertilization appears to ultimately restore methylation levels in the embryo [85,87], with CHH methylation increasing greatly during embryogenesis before decreasing substantially during seed germination [93–96]. In contrast with the embryo, the endosperm is hypomethylated [86] due to demethylation by DME [79].

There is limited evidence of extensive DNA methylation changes in plants during later stages of development. Comparison of such distinct tissues as leaves and inflorescences have found largely similar patterns [92]. Again, this is in contrast with mammalian development, where distinct DNA methylation changes can be found [12,13]. However, this may in part be a limitation of the common use of whole organs (e.g. leaves, roots, etc.) in past research. A handful of studies have identified tissue and cell-type specific DNA methylation differences (Figure 3C) in *A. thaliana* roots [97], *Sorghum bicolor* vasculature [98], and *Medicago truncatula* root nodules [99]. Furthermore, DNA methylation has a role in *A. thaliana* flowering time and experimental populations with disrupted DNA methylation, such as epigenetic recombinant inbred lines (epiRILs) [100,101], show altered developmental phenotypes.

DNA methylation has essential roles in mediating interactions between parental genomes, or in the case of polyploids, subgenomes. RdDM and demethylation pathways can be involved in imprinting and the biased expression of paternal or maternal alleles [102] with developmental impacts [102,103]. The importance of DNA methylation in these processes can vary with the species. For example, paternally expressed imprinted genes (PEGs) in *Arabidopsis lyrata* are associated with CHG hypermethylation and silencing of the maternal allele, but not in *A. thaliana* [104]. Changes in DNA methylation can occur as a result of hybridization between genetically distinct lines [105–108]. These can even be induced in hybrids of genetically similar lines with differing DNA methylation states. For instance, offspring of a cross between a hypomethylated *A. thaliana* plant and a normally methylated *A. thaliana* plant-induced novel epialleles and resulted in TE reactivation [109]. However, most DNA methylation differences between parents are stably associated with and segregate with the original parental genotype [106,107]. DNA methylation changes also occur in interspecific hybridization [110,111]. It is thought that changes from both intra and interspecific hybrids are the result of some sort of ‘shock’ (variously referred to as genomic, epigenomic, or transcriptomic ‘shock’)

resulting from novel interactions induced between genetically/transcriptionally distinct genomes. Changes in DNA methylation continue following whole-genome duplication or gene duplication [86,111–114] and non-CG methylation, appears to play a role in mediating gene expression of paralogous genes following polyploidization through interactions with TEs [113]. Such genome–epigenome interactions shape genome evolution and phenotypes, yet we have little understanding of the mechanisms by which these events are sensed and triggered.

## Environmental interactions and stress

Extensive changes to chromatin architecture and gene expression occur during plant stress responses [115]. DNA methylation, in particular, has been extensively studied for its role in stress [116,117]. A commonly observed trend is that the most dynamic DNA methylation changes are typically for non-CG methylation at TEs and repeats [118–121]. For example, Downen et al. [118] found in *A. thaliana* that pathogen-induced differences in methylation, especially those associated with changes in gene expression, were enriched among neighboring TEs. Similarly, under abiotic stress, Secco et al. [121] showed that phosphate starvation-induced DNA methylation changes are localized at TEs near phosphate starvation-induced genes in *O. sativa*. Specifically, they observed increased levels of CHH methylation. However, the same stress in *A. thaliana* had a much smaller effect, suggesting that these effects are likely correlated with TE content [121]. Critically, they found that stress-induced differential DNA methylation followed gene expression changes and was concentrated on TEs, suggesting that changes in gene expression were causal in driving changes in DNA methylation, rather than the reverse. This fits with the putative role of CHH islands in creating a boundary between euchromatin and heterochromatin, ensuring that the chromatin changes due to high expression of stress-induced genes are not carried over to adjacent TEs. Alternatively, they may serve to buffer or fine-tune gene expression through mechanisms like SUVH1/SUVH3/DNAJ1/DNAJ2 [84].

DNA methylation mutants provide further evidence for the role of DNA methylation in stress responses. For example, defense responses are enhanced in non-CG methylation mutants. These mutants show constitutive priming of PATHOGENESIS-RELATED 1 (*PR1*), a molecular marker for systemic acquired resistance [122]. However, the *PR1* promoter is not normally methylated, and transgenerational priming is not dependent on DNA methylation of *PR1*, suggesting potential *trans*-acting regulation [123]. Improved biotic and abiotic stress tolerance has also been observed in epiRILs and other novel epi-mutagenized populations [124,125]. These can be inherited for several generations; however, the DNA methylation changes were induced through genetic means, not stress. Unequivocal examples of transgenerational inheritance of stress-induced epigenetic changes are scarce [88,126]. In plants, environmentally induced DNA methylation variation can be inherited to a limited extent within the first-generation, but shows little evidence of long-term stable inheritance [116,127,128]. A growing body of evidence suggests an intervening generation of sexual reproduction without stress resets acquired epigenetic changes (Figure 3D), thus questioning the transgenerational stability and adaptive role of environmentally induced changes [128,129]. Stress-induced epigenetic changes can be conditionally transmitted to offspring through the female lineage, but on the paternal side transmission of acquired DNA methylation changes are restricted by DME DNA glycosylase activity [128]. Furthermore, *DDM1* and *Morpheus' Molecule 1*, which encodes a transcriptional repressor, function together in restoring DNA methylation to prestress states, preventing its transgenerational inheritance [130].

## Perspectives and conclusions

It is notable how widespread non-CG methylation is in plants. A point underscored by the evolution of multiple novel pathways for its establishment and maintenance. Across plants, DNA methylation varies significantly within [131,132] and between species [18,133–135], with non-CG methylation having the greatest variance. Some of this variation is explained by differences in target sequences (e.g. TEs), however, much is explained by variation in the underlying pathways [21,22,36,131]. The recent discovery of multiple non-canonical RdDM pathways [61] shows that these pathways have not been fully elucidated. We also still have much to learn regarding how the different DNA methylation pathways interact with each other [14,136] and with other epigenomic and gene-regulatory mechanisms to shape plant development and environmental responses. Two methodological advances will be necessary to further our understanding of the roles of DNA methylation in plants. The first will be the application of tissue-specific and single-cell methods [137]. The second will be improved methods of manipulating DNA methylation to directly test the functionality of specific methylation changes. Plant populations with disrupted epigenomes, such as epiRILs [100,101] and epi-mutagenized lines [138–140] are already making progress in this area. More powerful yet will be the development of methods for making locus-specific modifications to DNA methylation, as recently demonstrated in *A. thaliana* [141]. With these advances we can more fully understand how non-CG methylation has and continues to shape plant genomes.

## Summary

- Plant epigenomes are characterized by extensive non-CG cytosine DNA methylation at CHG and CHH (H = A, T, or C) sites.
- Non-CG methylation is established by the plant-specific CMT and RdDM pathways.
- Non-CG DNA methylation has roles in transposon and gene silencing, genome integrity, reproduction, development, and environmental responses.
- Extensive natural variation in non-CG DNA methylation and the underlying pathways exists both within and between plant species.

## Acknowledgments

The authors would like to thank Bruce Martin for the artistic portrayal of the *Z. mays* plant and Dr. Adam Bewick for comments on the manuscript. We also thank the two anonymous reviewers for their valuable feedback.

## Competing Interests

The authors declare that there are no competing interests associated with the manuscript.

## Funding

This work is supported by Michigan State University through a Startup Package and by USDA National Institute of Food and Agriculture Hatch Funds [project number MICL02572 (to C.E.N.)]; and the MSU University Distinguished Fellowship [to E.J.R.].

## Author Contribution

S.K.K.R., E.J.R., and C.E.N. each contributed to the planning, preparation, and editing of the manuscript.

## Abbreviations

AGO, ARGONAUTE; BAH, Bromo-Adjacent Homology; CHROMO, CHROMatin Organization Modifier; CLSY, CLASSY; CMT, CHROMOMETHYLASE; DCL, DICER-LIKE; DDM1, DECREASE IN DNA METHYLATION 1; DME, DEMETER; DNMT, DNA METHYLTRANSFERASE; DRM2, DOMAINS REARRANGED METHYLTRANSFERASE 2; epiRIL, epigenetic Recombinant Inbred Line; hCMT, homologous CMT; KYP, KRYPTONITE; MET1, METHYLTRANSFERASE 1; miRNA, microRNA; MPS1, MULTIPOLAR SPINDLE 1; PEG, paternally expressed imprinted genes; PMC, Pollen Mother Cell; PR1, PATHOGENESIS-RELATED 1; PTGS, Post-Transcriptional Gene Silencing; RdDM, RNA-directed DNA Methylation; RDM1, RNA-DIRECTED DNA METHYLATION 1; RDR, RNA-DEPENDENT RNA POLYMERASE; ROS1, REPRESSOR OF SILENCING 1; SHH1, SAWADEE HOME-ODOMAIN HOMOLOGUE 1; SNF2, Sucrose Non-Fermentable 2; SRA, SET and RING finger associated; SUVH, SUPPRESSOR OF VARIATION HOMOLOG; SWI2, SWItch 2; TE, transposable element; VN, vegetative nucleus; ZMET, Zea methyltransferase.

## References

- 1 Feng, S., Cokus, S.J., Zhang, X., Chen, P.-Y., Bostick, M., Goll, M.G. et al. (2010) Conservation and divergence of methylation patterning in plants and animals. *Proc. Natl. Acad. Sci. U.S.A.* **107**, 8689–8694, <https://doi.org/10.1073/pnas.1002720107>
- 2 Zemach, A., McDaniel, I.E., Silva, P. and Zilberman, D. (2010) Genome-wide evolutionary analysis of eukaryotic DNA methylation. *Science* **328**, 916–919, <https://doi.org/10.1126/science.1186366>
- 3 Sánchez-Romero, M.A., Cota, I. and Casadesús, J. (2015) DNA methylation in bacteria: from the methyl group to the methylome. *Curr. Opin. Microbiol.* **25**, 9–16, <https://doi.org/10.1016/j.mib.2015.03.004>
- 4 Zhong, X. (2016) Comparative epigenomics: a powerful tool to understand the evolution of DNA methylation. *New Phytol.* **210**, 76–80, <https://doi.org/10.1111/nph.13540>
- 5 Colot, V. and Rossignol, J.L. (1999) Eukaryotic DNA methylation as an evolutionary device. *Bioessays* **21**, 402–411, [https://doi.org/10.1002/\(SICI\)1521-1878\(199905\)21:5%3c402::AID-BIES7%3e3.0.CO;2-B](https://doi.org/10.1002/(SICI)1521-1878(199905)21:5%3c402::AID-BIES7%3e3.0.CO;2-B)
- 6 Finnegan, E.J. and Dennis, E.S. (1993) Isolation and identification by sequence homology of a putative cytosine methyltransferase from *Arabidopsis thaliana*. *Nucleic Acids Res.* **21**, 2383–2388, <https://doi.org/10.1093/nar/21.10.2383>
- 7 Gruenbaum, Y., Naveh-Many, T., Cedar, H. and Razin, A. (1981) Sequence specificity of methylation in higher plant DNA. *Nature* **292**, 860–862, <https://doi.org/10.1038/292860a0>



- 8 Meyer, P., Niedenhof, I. and ten Lohuis, M. (1994) Evidence for cytosine methylation of non-symmetrical sequences in transgenic *Petunia hybrida*. *EMBO J.* **13**, 2084–2088, <https://doi.org/10.1002/j.1460-2075.1994.tb06483.x>
- 9 Xie, W., Barr, C.L., Kim, A., Yue, F., Lee, A.Y., Eubanks, J. et al. (2012) Base-resolution analyses of sequence and parent-of-origin dependent DNA methylation in the mouse genome. *Cell* **148**, 816–831, <https://doi.org/10.1016/j.cell.2011.12.035>
- 10 Lister, R., Pelizzola, M., Dowen, R.H., Hawkins, R.D., Hon, G., Tonti-Filippini, J. et al. (2009) Human DNA methylomes at base resolution show widespread epigenomic differences. *Nature* **462**, 315–322, <https://doi.org/10.1038/nature08514>
- 11 Lister, R., Mukamel, E.A., Nery, J.R., Urich, M., Puddifoot, C.A., Johnson, N.D. et al. (2013) Global epigenomic reconfiguration during mammalian brain development. *Science* **341**, 1237905, <https://doi.org/10.1126/science.1237905>
- 12 Varley, K.E., Gertz, J., Bowling, K.M., Parker, S.L., Reddy, T.E., Pauli-Behn, F. et al. (2013) Dynamic DNA methylation across diverse human cell lines and tissues. *Genome Res.* **23**, 555–567, <https://doi.org/10.1101/gr.147942.112>
- 13 Schultz, M.D., He, Y., Whitaker, J.W., Hariharan, M., Mukamel, E.A., Leung, D. et al. (2015) Human body epigenome maps reveal noncanonical DNA methylation variation. *Nature* **523**, 212–216, <https://doi.org/10.1038/nature14465>
- 14 Stroud, H., Do, T., Du, J., Zhong, X., Feng, S., Johnson, L. et al. (2014) Non-CG methylation patterns shape the epigenetic landscape in *Arabidopsis*. *Nat. Struct. Mol. Biol.* **21**, 64–72, <https://doi.org/10.1038/nsmb.2735>
- 15 Lindroth, A.M., Cao, X., Jackson, J.P., Zilberman, D., McCallum, C.M., Henikoff, S. et al. (2001) Requirement of CHROMOMETHYLASE3 for maintenance of CpXpG methylation. *Science* **292**, 2077–2080, <https://doi.org/10.1126/science.1059745>
- 16 Cao, X. and Jacobsen, S.E. (2002) Locus-specific control of asymmetric and CpNpG methylation by the DRM and CMT3 methyltransferase genes. *Proc. Natl. Acad. Sci. U.S.A.* **99**, 16491–16498, <https://doi.org/10.1073/pnas.162371599>
- 17 Cao, X. and Jacobsen, S.E. (2002) Role of the *Arabidopsis* DRM methyltransferases in de novo DNA methylation and gene silencing. *Curr. Biol.* **12**, 1138–1144, [https://doi.org/10.1016/S0960-9822\(02\)00925-9](https://doi.org/10.1016/S0960-9822(02)00925-9)
- 18 Zemach, A., Yvonne Kim, M., Hsieh, P.-H., Coleman-Derr, D., Eshed-Williams, L., Thao, K. et al. (2013) The *Arabidopsis* nucleosome remodeler DDM1 allows DNA methyltransferases to access H1-containing heterochromatin. *Cell* **153**, 193–205, <https://doi.org/10.1016/j.cell.2013.02.033>
- 19 Henikoff, S. and Comai, L. (1998) A DNA methyltransferase homolog with a chromodomain exists in multiple polymorphic forms in *Arabidopsis*. *Genetics* **149**, 307–318
- 20 Bartee, L., Malagnac, F. and Bender, J. (2001) *Arabidopsis* cmt3 chromomethylase mutations block non-CG methylation and silencing of an endogenous gene. *Genes Dev.* **15**, 1753–1758, <https://doi.org/10.1101/gad.905701>
- 21 Bewick, A.J., Niederhuth, C.E., Ji, L., Rohr, N.A., Griffin, P.T., Leebens-Mack, J. et al. (2017) The evolution of CHROMOMETHYLASES and gene body DNA methylation in plants. *Genome Biol.* **18**, 65, <https://doi.org/10.1186/s13059-017-1195-1>
- 22 Papa, C.M., Springer, N.M., Muszynski, M.G., Meeley, R. and Kaeppler, S.M. (2001) Maize chromomethylase *Zea methyltransferase2* is required for CpNpG methylation. *Plant Cell* **13**, 1919–1928, <https://doi.org/10.1105/TPC.010064>
- 23 Gouil, Q. and Baulcombe, D.C. (2016) DNA methylation signatures of the plant Chromomethyltransferases. *PLoS Genet.* **12**, e1006526, <https://doi.org/10.1371/journal.pgen.1006526>
- 24 Li, Q., Eichten, S.R., Herrmannson, P.J., Zaunbrecher, V.M., Song, J., Wendt, J. et al. (2014) Genetic perturbation of the maize methylome. *Plant Cell* **26**, 4602–4616, <https://doi.org/10.1105/tpc.114.133140>
- 25 Yadav, N., Khadka, J., Zemach, A. and Grafi, G. (2018) CMT3 and SUVH4/KYP silence the exonic retroelement *Evelknievel* to allow for reconstitution of CMT1 mRNA. *Epigenetics Chromatin* **11**, 69, <https://doi.org/10.1186/s13072-018-0240-y>
- 26 Cheng, C., Tarutani, Y., Miyao, A., Ito, T., Yamazaki, M., Sakai, H. et al. (2015) Loss of function mutations in the rice chromomethylase *OscMT3a* cause a burst of transposition. *Plant J.* **83**, 1069–1081, <https://doi.org/10.1111/tpj.12952>
- 27 Noy-Malka, C., Yaari, R., Itzhaki, R., Mosquana, A., Auerbach Gershovitz, N., Katz, A. et al. (2014) A single CMT methyltransferase homolog is involved in CHG DNA methylation and development of *Physcomitrella patens*. *Plant Mol. Biol.* **84**, 719–735, <https://doi.org/10.1007/s11103-013-0165-6>
- 28 Du, J., Zhong, X., Bernatavichute, Y.V., Stroud, H., Feng, S., Caro, E. et al. (2012) Dual binding of chromomethylase domains to H3K9me2-containing nucleosomes directs DNA methylation in plants. *Cell* **151**, 167–180, <https://doi.org/10.1016/j.cell.2012.07.034>
- 29 Stoddard, C.I., Feng, S., Campbell, M.G., Liu, W., Wang, H., Zhong, X. et al. (2019) A nucleosome bridging mechanism for activation of a maintenance DNA methyltransferase. *Mol. Cell* **73**, 73.e6–83.e6, <https://doi.org/10.1016/j.molcel.2018.10.006>
- 30 Johnson, L., Cao, X. and Jacobsen, S. (2002) Interplay between two epigenetic marks. DNA methylation and histone H3 lysine 9 methylation. *Curr. Biol.* **12**, 1360–1367, [https://doi.org/10.1016/S0960-9822\(02\)00976-4](https://doi.org/10.1016/S0960-9822(02)00976-4)
- 31 Li, X., Harris, C.J., Zhong, Z., Chen, W., Liu, R., Jia, B. et al. (2018) Mechanistic insights into plant SUVH family H3K9 methyltransferases and their binding to context-biased non-CG DNA methylation. *Proc. Natl. Acad. Sci. U.S.A.* **115**, E8793–E8802, <https://doi.org/10.1073/pnas.1809841115>
- 32 Johnson, L.M., Bostick, M., Zhang, X., Kraft, E., Henderson, I., Callis, J. et al. (2007) The SRA methyl-cytosine-binding domain links DNA and histone methylation. *Curr. Biol.* **17**, 379–384, <https://doi.org/10.1016/j.cub.2007.01.009>
- 33 Du, J., Johnson, L.M., Groth, M., Feng, S., Hale, C.J., Li, S. et al. (2014) Mechanism of DNA methylation-directed histone methylation by KRYPTONITE. *Mol. Cell* **55**, 495–504, <https://doi.org/10.1016/j.molcel.2014.06.009>
- 34 Du, J., Johnson, L.M., Jacobsen, S.E. and Patel, D.J. (2015) DNA methylation pathways and their crosstalk with histone methylation. *Nat. Rev. Mol. Cell Biol.* **16**, 519–532, <https://doi.org/10.1038/nrm4043>
- 35 Song, X. and Cao, X. (2017) Context and complexity: analyzing methylation in trinucleotide sequences. *Trends Plant Sci.* **22**, 351–353, <https://doi.org/10.1016/j.tplants.2017.03.013>
- 36 Bewick, A.J., Ji, L., Niederhuth, C.E., Willing, E.-M., Hofmeister, B.T., Shi, X. et al. (2016) On the origin and evolutionary consequences of gene body DNA methylation. *Proc. Natl. Acad. Sci. U.S.A.* **113**, 9111–9116, <https://doi.org/10.1073/pnas.1604666113>
- 37 Kiefer, C., Willing, E.-M., Jiao, W.-B., Sun, H., Piednoël, M., Hümann, U. et al. (2019) Interspecies association mapping links reduced CG to TG substitution rates to the loss of gene-body methylation. *Nat. Plant* **5**, 846–855, <https://doi.org/10.1038/s41477-019-0486-9>

- 38 Wendte, J.M., Zhang, Y., Ji, L., Shi, X., Hazarika, R.R., Shahryari, Y. et al. (2019) Epimutations are associated with CHROMOMETHYLASE 3-induced *de novo* DNA methylation. *Elife* **8**, e47891, <https://doi.org/10.7554/eLife.47891>
- 39 Wassenegger, M., Heimes, S. and Sanger, H.L. (1994) An infectious viroid RNA replicon evolved from an *in vitro*-generated non-infectious viroid deletion mutant via a complementary deletion *in vivo*. *EMBO J.* **13**, 6172–6177, <https://doi.org/10.1002/j.1460-2075.1994.tb06964.x>
- 40 Matzke, M.A., Kanno, T. and Matzke, A.J.M. (2015) RNA-directed DNA methylation: the evolution of a complex epigenetic pathway in flowering plants. *Annu. Rev. Plant Biol.* **66**, 243–267, <https://doi.org/10.1146/annurev-arplant-043014-114633>
- 41 Matzke, M.A. and Mosher, R.A. (2014) RNA-directed DNA methylation: an epigenetic pathway of increasing complexity. *Nat. Rev. Genet.* **15**, 394–408, <https://doi.org/10.1038/nrg3683>
- 42 Law, J.A., Du, J., Hale, C.J., Feng, S., Krajewski, K., Palanca, A.M.S. et al. (2013) Polymerase IV occupancy at RNA-directed DNA methylation sites requires SHH1. *Nature* **498**, 385–389, <https://doi.org/10.1038/nature12178>
- 43 Smith, L.M., Pontes, O., Searle, I., Yelina, N., Yousafzai, F.K., Herr, A.J. et al. (2007) An SNF2 protein associated with nuclear RNA silencing and the spread of a silencing signal between cells in Arabidopsis. *Plant Cell* **19**, 1507–1521, <https://doi.org/10.1105/tpc.107.051540>
- 44 Law, J.A., Vashisht, A.A., Wohlschlegel, J.A. and Jacobsen, S.E. (2011) SHH1, a homeodomain protein required for DNA methylation, as well as RDR2, RDM4, and chromatin remodeling factors, associate with RNA polymerase IV. *PLoS Genet.* **7**, e1002195, <https://doi.org/10.1371/journal.pgen.1002195>
- 45 Zhou, M., Palanca, A.M.S. and Law, J.A. (2018) Locus-specific control of the *de novo* DNA methylation pathway in Arabidopsis by the CLASSY family. *Nat. Genet.* **50**, 865–873, <https://doi.org/10.1038/s41588-018-0115-y>
- 46 Li, S., Vandivier, L.E., Tu, B., Gao, L., Won, S.Y., Li, S. et al. (2015) Detection of Pol IV/RDR2-dependent transcripts at the genomic scale in Arabidopsis reveals features and regulation of siRNA biogenesis. *Genome Res.* **25**, 235–245, <https://doi.org/10.1101/gr.182238.114>
- 47 Zhai, J., Bischof, S., Wang, H., Feng, S., Lee, T.-F., Teng, C. et al. (2015) A one precursor one siRNA model for Pol IV-dependent siRNA biogenesis. *Cell* **163**, 445–455, <https://doi.org/10.1016/j.cell.2015.09.032>
- 48 Haag, J.R., Ream, T.S., Marasco, M., Nicora, C.D., Norbeck, A.D., Pasa-Tolic, L. et al. (2012) *In vitro* transcription activities of Pol IV, Pol V, and RDR2 reveal coupling of Pol IV and RDR2 for dsRNA synthesis in plant RNA silencing. *Mol. Cell* **48**, 811–818, <https://doi.org/10.1016/j.molcel.2012.09.027>
- 49 Johnson, L.M., Du, J., Hale, C.J., Bischof, S., Feng, S., Chodavarapu, R.K. et al. (2014) SRA- and SET-domain-containing proteins link RNA polymerase V occupancy to DNA methylation. *Nature* **507**, 124–128, <https://doi.org/10.1038/nature12931>
- 50 Wierzbicki, A.T., Haag, J.R. and Pikaard, C.S. (2008) Noncoding transcription by RNA polymerase Pol IVb/Pol V mediates transcriptional silencing of overlapping and adjacent genes. *Cell* **135**, 635–648, <https://doi.org/10.1016/j.cell.2008.09.035>
- 51 Zilberman, D., Cao, X. and Jacobsen, S.E. (2003) ARGONAUTE4 control of locus-specific siRNA accumulation and DNA and histone methylation. *Science* **299**, 716–719, <https://doi.org/10.1126/science.1079695>
- 52 Bies-Ethève, N., Pontier, D., Lahmy, S., Picart, C., Vega, D., Cooke, R. et al. (2009) RNA-directed DNA methylation requires an AGO4-interacting member of the SPT5 elongation factor family. *EMBO Rep.* **10**, 649–654, <https://doi.org/10.1038/embor.2009.31>
- 53 He, X.-J., Hsu, Y.-F., Zhu, S., Wierzbicki, A.T., Pontes, O., Pikaard, C.S. et al. (2009) An effector of RNA-directed DNA methylation in Arabidopsis is an ARGONAUTE 4- and RNA-binding protein. *Cell* **137**, 498–508, <https://doi.org/10.1016/j.cell.2009.04.028>
- 54 Liu, W., Duttke, S.H., Hetzel, J., Groth, M., Feng, S., Gallego-Bartolome, J. et al. (2018) RNA-directed DNA methylation involves co-transcriptional small-RNA-guided slicing of polymerase V transcripts in Arabidopsis. *Nat. Plants* **4**, 181–188, <https://doi.org/10.1038/s41477-017-0100-y>
- 55 Zhang, H., Lang, Z. and Zhu, J.-K. (2018) Dynamics and function of DNA methylation in plants. *Nat. Rev. Mol. Cell Biol.* **19**, 489–506, <https://doi.org/10.1038/s41580-018-0016-z>
- 56 Xie, Z., Johansen, L.K., Gustafson, A.M., Kasschau, K.D., Lellis, A.D., Zilberman, D. et al. (2004) Genetic and functional diversification of small RNA pathways in plants. *PLoS Biol.* **2**, E104, <https://doi.org/10.1371/journal.pbio.0020104>
- 57 Ream, T.S., Haag, J.R., Wierzbicki, A.T., Nicora, C.D., Norbeck, A.D., Zhu, J.-K. et al. (2009) Subunit compositions of the RNA-silencing enzymes Pol IV and Pol V reveal their origins as specialized forms of RNA Polymerase II. *Mol. Cell* **33**, 192–203, <https://doi.org/10.1016/j.molcel.2008.12.015>
- 58 Huang, Y., Kendall, T., Forsythe, E.S., Dorantes-Acosta, A., Li, S., Caballero-Pérez, J. et al. (2015) Ancient origin and recent innovations of RNA Polymerase IV and V. *Mol. Biol. Evol.* **32**, 1788–1799, <https://doi.org/10.1093/molbev/msv060>
- 59 Ma, L., Hatlen, A., Kelly, L.J., Becher, H., Wang, W., Kovarik, A. et al. (2015) Angiosperms are unique among land plant lineages in the occurrence of key genes in the RNA-Directed DNA Methylation (RdDM) pathway. *Genome Biol. Evol.* **7**, 2648–2662, <https://doi.org/10.1093/gbe/evv171>
- 60 Trujillo, J.T., Seetharam, A.S., Hufford, M.B., Beilstein, M.A. and Mosher, R.A. (2018) Evidence for a unique DNA-dependent RNA polymerase in cereal crops. *Mol. Biol. Evol.* **35**, 2454–2462, <https://doi.org/10.1093/molbev/msy146>
- 61 Cuerda-Gil, D. and Slotkin, R.K. (2016) Non-canonical RNA-directed DNA methylation. *Nat. Plants* **2**, 16163, <https://doi.org/10.1038/nplants.2016.163>
- 62 Nuthikattu, S., McCue, A.D., Panda, K., Fultz, D., DeFraia, C., Thomas, E.N. et al. (2013) The initiation of epigenetic silencing of active transposable elements is triggered by RDR6 and 21–22 nucleotide small interfering RNAs. *Plant Physiol.* **162**, 116–131, <https://doi.org/10.1104/pp.113.216481>
- 63 McCue, A.D., Panda, K., Nuthikattu, S., Choudury, S.G., Thomas, E.N., Slotkin, R.K. et al. (2015) ARGONAUTE 6 bridges transposable element mRNA-derived siRNAs to the establishment of DNA methylation. *EMBO J.* **34**, 20–35, <https://doi.org/10.15252/embj.201489499>
- 64 Gascioli, V., Mallory, A.C., Bartel, D.P. and Vaucheret, H. (2005) Partially redundant functions of Arabidopsis DICER-like enzymes and a role for DCL4 in producing trans-acting siRNAs. *Curr. Biol.* **15**, 1494–1500, <https://doi.org/10.1016/j.cub.2005.07.024>
- 65 Panda, K., Ji, L., Neumann, D.A., Daron, J., Schmitz, R.J., Slotkin, R.K. et al. (2016) Full-length autonomous transposable elements are preferentially targeted by expression-dependent forms of RNA-directed DNA methylation. *Genome Biol.* **17**, 170, <https://doi.org/10.1186/s13059-016-1032-y>
- 66 Vazquez, F., Blevins, T., Ailhas, J., Boller, T. and Meins, Jr, F. (2008) Evolution of Arabidopsis MIR genes generates novel microRNA classes. *Nucleic Acids Res.* **36**, 6429–6438, <https://doi.org/10.1093/nar/gkn670>
- 67 Yang, D.-L., Zhang, G., Tang, K., Li, J., Yang, L., Huang, H. et al. (2016) Dicer-independent RNA-directed DNA methylation in Arabidopsis. *Cell Res.* **26**, 1264, <https://doi.org/10.1038/cr.2016.122>

- 68 Mari-Ordóñez, A., Chen, Z., Lian, B., Rowley, M.J., Xia, N., Chai, J. et al. (2013) Reconstructing de novo silencing of an active plant retrotransposon. *Nat. Genet.* **45**, 1029–1039, <https://doi.org/10.1038/ng.2703>
- 69 Ye, R., Chen, Z., Lian, B., Rowley, M.J., Xia, N., Chai, J. et al. (2016) A dicer-independent route for biogenesis of siRNAs that direct DNA methylation in Arabidopsis. *Mol. Cell* **61**, 222–235, <https://doi.org/10.1016/j.molcel.2015.11.015>
- 70 Kazazian, H.H. (2004) Mobile elements: drivers of genome evolution. *Science* **303**, 1626–1632, <https://doi.org/10.1126/science.1089670>
- 71 Kronmiller, B.A. and Wise, R.P. (2008) TEnest: automated chronological annotation and visualization of nested plant transposable elements. *Plant Physiol.* **146**, 45–59, <https://doi.org/10.1104/pp.107.110353>
- 72 Underwood, C.J., Henderson, I.R. and Martienssen, R.A. (2017) Genetic and epigenetic variation of transposable elements in Arabidopsis. *Curr. Opin. Plant Biol.* **36**, 135–141, <https://doi.org/10.1016/j.pbi.2017.03.002>
- 73 Law, J.A. and Jacobsen, S.E. (2010) Establishing, maintaining and modifying DNA methylation patterns in plants and animals. *Nat. Rev. Genet.* **11**, 204–220, <https://doi.org/10.1038/nrg2719>
- 74 Belyayev, A. (2014) Bursts of transposable elements as an evolutionary driving force. *J. Evol. Biol.* **27**, 2573–2584, <https://doi.org/10.1111/jeb.12513>
- 75 Daccord, N., Celton, J.-M., Linsmith, G., Becker, C., Choisin, N., Schijlen, E. et al. (2017) High-quality de novo assembly of the apple genome and methylome dynamics of early fruit development. *Nat. Genet.* **49**, 1099–1106, <https://doi.org/10.1038/ng.3886>
- 76 Jeddeloh, J.A., Bender, J. and Richards, E.J. (1998) The DNA methylation locus DDM1 is required for maintenance of gene silencing in Arabidopsis. *Genes Dev.* **12**, 1714–1725, <https://doi.org/10.1101/gad.12.11.1714>
- 77 Jeddeloh, J.A., Stokes, T.L. and Richards, E.J. (1999) Maintenance of genomic methylation requires a SWI2/SNF2-like protein. *Nat. Genet.* **22**, 94–97, <https://doi.org/10.1038/8803>
- 78 Gendrel, A.-V., Lippman, Z., Yordan, C., Colot, V. and Martienssen, R.A. (2002) Dependence of heterochromatic histone H3 methylation patterns on the Arabidopsis gene DDM1. *Science* **297**, 1871–1873, <https://doi.org/10.1126/science.1074950>
- 79 Ibarra, C.A., Feng, X., Schoft, V.K., Hsieh, T.-F., Uzawa, R., Rodrigues, J.A. et al. (2012) Active DNA demethylation in plant companion cells reinforces transposon methylation in gametes. *Science* **337**, 1360–1364, <https://doi.org/10.1126/science.1224839>
- 80 Hirsch, C.D. and Springer, N.M. (2017) Transposable element influences on gene expression in plants. *Biochim. Biophys. Acta Gene Regul. Mech.* **1860**, 157–165, <https://doi.org/10.1016/j.bbagr.2016.05.010>
- 81 Ong-Abdullah, M., Ordway, J.M., Jiang, N., Ooi, S.-E., Kok, S.-Y., Sarpan, N. et al. (2015) Loss of Karma transposon methylation underlies the mantled somaclonal variant of oil palm. *Nature* **525**, 533–537, <https://doi.org/10.1038/nature15365>
- 82 Gent, J.I., Dong, Y., Jiang, J. and Dawe, R.K. (2012) Strong epigenetic similarity between maize centromeric and pericentromeric regions at the level of small RNAs, DNA methylation and H3 chromatin modifications. *Nucleic Acids Res.* **40**, 1550–1560, <https://doi.org/10.1093/nar/gkr862>
- 83 Li, Q., Gent, J.I., Zynda, G., Song, J., Makarevitch, I., Hirsch, C.D. et al. (2015) RNA-directed DNA methylation enforces boundaries between heterochromatin and euchromatin in the maize genome. *Proc. Natl. Acad. Sci. U.S.A.* **112**, 14728–14733, <https://doi.org/10.1073/pnas.1514680112>
- 84 Harris, C.J., Scheibe, M., Wongpalee, S.P., Liu, W., Cornett, E.M., Vaughan, R.M. et al. (2018) A DNA methylation reader complex that enhances gene transcription. *Science* **362**, 1182–1186, <https://doi.org/10.1126/science.aar7854>
- 85 Ingouff, M., Selles, B., Michaud, C., Vu, T.M., Berger, F., Schorn, A.J. et al. (2017) Live-cell analysis of DNA methylation during sexual reproduction in Arabidopsis reveals context and sex-specific dynamics controlled by noncanonical RdDM. *Genes Dev.* **31**, 72–83, <https://doi.org/10.1101/gad.289397.116>
- 86 Wang, G. and Köhler, C. (2017) Epigenetic processes in flowering plant reproduction. *J. Exp. Bot.* **68**, 797–807, <https://doi.org/10.1093/jxb/erw486>
- 87 Kawashima, T. and Berger, F. (2014) Epigenetic reprogramming in plant sexual reproduction. *Nat. Rev. Genet.* **15**, 613–624, <https://doi.org/10.1038/nrg3685>
- 88 Heard, E. and Martienssen, R.A. (2014) Transgenerational epigenetic inheritance: myths and mechanisms. *Cell* **157**, 95–109, <https://doi.org/10.1016/j.cell.2014.02.045>
- 89 Walker, J., Gao, H., Zhang, J., Aldridge, B., Vickers, M., Higgins, J.D. et al. (2018) Sexual-lineage-specific DNA methylation regulates meiosis in Arabidopsis. *Nat. Genet.* **50**, 130–137, <https://doi.org/10.1038/s41588-017-0008-5>
- 90 Slotkin, R.K., Vaughn, M., Borges, F., Tanurdzić, M., Becker, J.D., Feijó, J.A. et al. (2009) Epigenetic reprogramming and small RNA silencing of transposable elements in pollen. *Cell* **136**, 461–472, <https://doi.org/10.1016/j.cell.2008.12.038>
- 91 Calarco, J.P., Borges, F., Donoghue, M.T.A., Van Ex, F., Jullien, P.E., Lopes, T. et al. (2012) Reprogramming of DNA methylation in pollen guides epigenetic inheritance via small RNA. *Cell* **151**, 194–205, <https://doi.org/10.1016/j.cell.2012.09.001>
- 92 Schmitz, R.J., Schultz, M.D., Urlich, M.A., Nery, J.R., Pelizzola, M., Libiger, O. et al. (2013) Patterns of population epigenomic diversity. *Nature* **495**, 193–198, <https://doi.org/10.1038/nature11968>
- 93 Lin, J.-Y., Le, B.H., Chen, M., Henry, K.F., Hur, J., Hsieh, T.-F. et al. (2017) Similarity between soybean and Arabidopsis seed methylomes and loss of non-CG methylation does not affect seed development. *Proc. Natl. Acad. Sci. U.S.A.* **114**, E9730–E9739, <https://doi.org/10.1073/pnas.1716758114>
- 94 Narsai, R., Guoil, Q., Secco, D., Srivastava, A., Karpievitch, Y.V., Liew, L.C. et al. (2017) Extensive transcriptomic and epigenomic remodelling occurs during Arabidopsis thaliana germination. *Genome Biol.* **18**, 172, <https://doi.org/10.1186/s13059-017-1302-3>
- 95 Bouyer, D., Kramdi, A., Kassam, M., Heese, M., Schnittger, A., Roudier, F. et al. (2017) DNA methylation dynamics during early plant life. *Genome Biol.* **18**, 179, <https://doi.org/10.1186/s13059-017-1313-0>
- 96 Kawakatsu, T., Nery, J.R., Castanon, R. and Ecker, J.R. (2017) Dynamic DNA methylation reconfiguration during seed development and germination. *Genome Biol.* **18**, 171, <https://doi.org/10.1186/s13059-017-1251-x>
- 97 Kawakatsu, T., Stuart, T., Valdes, M., Breakfield, N., Schmitz, R.J., Nery, J.R. et al. (2016) Unique cell-type-specific patterns of DNA methylation in the root meristem. *Nat. Plants* **2**, 16058, <https://doi.org/10.1038/nplants.2016.58>
- 98 Turco, G.M., Kajala, K., Kunde-Ramamoorthy, G., Ngan, C.-Y., Olson, A., Deshpande, S. et al. (2017) DNA methylation and gene expression regulation associated with vascularization in Sorghum bicolor. *New Phytol.* **214**, 1213–1229, <https://doi.org/10.1111/nph.14448>



- 99 Satgé, C., Moreau, S., Sallet, E., Lefort, G., Auriac, M.-C., Remblière, C. et al. (2016) Reprogramming of DNA methylation is critical for nodule development in *Medicago truncatula*. *Nat. Plants* **2**, 16166, <https://doi.org/10.1038/nplants.2016.166>
- 100 Johannes, F., Porcher, E., Teixeira, F.K., Saliba-Colombani, V., Simon, M., Agier, N. et al. (2009) Assessing the impact of transgenerational epigenetic variation on complex traits. *PLoS Genet.* **5**, e1000530, <https://doi.org/10.1371/journal.pgen.1000530>
- 101 Reinders, J., Wulff, B.B.H., Mirouze, M., Mari-Ordóñez, A., Dapp, M., Rozhon, W. et al. (2009) Compromised stability of DNA methylation and transposon immobilization in mosaic *Arabidopsis* epigenomes. *Genes Dev.* **23**, 939–950, <https://doi.org/10.1101/gad.524609>
- 102 Satyaki, P.R.V. and Gehring, M. (2017) DNA methylation and imprinting in plants: machinery and mechanisms. *Crit. Rev. Biochem. Mol. Biol.* **52**, 163–175, <https://doi.org/10.1080/10409238.2017.1279119>
- 103 Pignatta, D., Novitzky, K., Satyaki, P.R.V. and Gehring, M. (2018) A variably imprinted epiallele impacts seed development. *PLoS Genet.* **14**, e1007469, <https://doi.org/10.1371/journal.pgen.1007469>
- 104 Klosinska, M., Picard, C.L. and Gehring, M. (2016) Conserved imprinting associated with unique epigenetic signatures in the *Arabidopsis* genus. *Nat. Plants* **2**, 16145, <https://doi.org/10.1038/nplants.2016.145>
- 105 Greaves, I.K., Groszmann, M., Ying, H., Taylor, J.M., James Peacock, W., Dennis, E.S. et al. (2012) Trans chromosomal methylation in *Arabidopsis* hybrids. *Proc. Natl. Acad. Sci. U.S.A.* **109**, 3570–3575, <https://doi.org/10.1073/pnas.1201043109>
- 106 Eichten, S.R., Swanson-Wagner, R.A., Schnable, J.C., Waters, A.J., Hermanson, P.J., Liu, S. et al. (2011) Heritable epigenetic variation among maize inbreds. *PLoS Genet.* **7**, e1002372, <https://doi.org/10.1371/journal.pgen.1002372>
- 107 Schmitz, R.J., He, Y., Valdes-Lopez, O., Khan, S.M., Joshi, T., Urich, M.A. et al. (2013) Epigenome-wide inheritance of cytosine methylation variants in a recombinant inbred population. *Genome Res.* **23**, 1663–1674, <https://doi.org/10.1101/gr.152538.112>
- 108 He, G., Zhu, X., Elling, A.A., Chen, L., Wang, X., Guo, L. et al. (2010) Global epigenetic and transcriptional trends among two rice subspecies and their reciprocal hybrids. *Plant Cell* **22**, 17–33, <https://doi.org/10.1105/tpc.109.072041>
- 109 Rigal, M., Becker, C., Pélissier, T., Pogorelnik, R., Devos, J., Ikeda, Y. et al. (2016) Epigenome confrontation triggers immediate reprogramming of DNA methylation and transposon silencing in *Arabidopsis thaliana* F1 epiphybrids. *Proc. Natl. Acad. Sci. U.S.A.* **113**, E2083–E2092, <https://doi.org/10.1073/pnas.1600672113>
- 110 Zhu, W., Hu, B., Becker, C., Doğan, E.S., Berendzen, K.W., Weigel, D. et al. (2017) Altered chromatin compaction and histone methylation drive non-additive gene expression in an interspecific *Arabidopsis* hybrid. *Genome Biol.* **18**, 157, <https://doi.org/10.1186/s13059-017-1281-4>
- 111 Edgar, P.P., Smith, R., McKain, M.R., Cooley, A.M., Vallejo-Marin, M., Yuan, Y. et al. Subgenome dominance in an interspecific hybrid, synthetic allopolyploid, and a 140 year old naturally established neo-allopolyploid monkeyflower. *Plant Cell* **29**, 2150–2167, <https://doi.org/10.1105/tpc.17.00010>
- 112 Cheng, F., Sun, C., Wu, J., Schnable, J., Woodhouse, M.R., Liang, J. et al. (2016) Epigenetic regulation of subgenome dominance following whole genome triplication in *Brassica rapa*. *New Phytol.* **211**, 288–299, <https://doi.org/10.1111/nph.13884>
- 113 Kim, K.D., El Baidouri, M., Abernathy, B., Iwata-Otsubo, A., Chavarró, C., Gonzales, M. et al. (2015) A comparative epigenomic analysis of polyploidy-derived genes in soybean and common bean. *Plant Physiol.* **168**, 1433–1447, <https://doi.org/10.1104/pp.15.00408>
- 114 El Baidouri, M., Kim, K.D., Abernathy, B., Li, Y.-H., Qiu, L.-J., Jackson, S.A. et al. (2018) Genic C-methylation in soybean is associated with gene paralogs relocated to transposable element-rich pericentromeres. *Mol. Plant* **11**, 485–495, <https://doi.org/10.1016/j.molp.2018.02.006>
- 115 Probst, A.V. and Mittelsten Scheid, O. (2015) Stress-induced structural changes in plant chromatin. *Curr. Opin. Plant Biol.* **27**, 8–16, <https://doi.org/10.1016/j.pbi.2015.05.011>
- 116 Lämke, J. and Bäurle, I. (2017) Epigenetic and chromatin-based mechanisms in environmental stress adaptation and stress memory in plants. *Genome Biol.* **18**, 124, <https://doi.org/10.1186/s13059-017-1263-6>
- 117 Mirouze, M. and Paszkowski, J. (2011) Epigenetic contribution to stress adaptation in plants. *Curr. Opin. Plant Biol.* **14**, 267–274, <https://doi.org/10.1016/j.pbi.2011.03.004>
- 118 Downen, R.H., Pelizzola, M., Schmitz, R.J., Lister, R., Downen, J.M., Nery, J.R. et al. (2012) Widespread dynamic DNA methylation in response to biotic stress. *Proc. Natl. Acad. Sci. U.S.A.* **109**, E2183–E2191, <https://doi.org/10.1073/pnas.1209329109>
- 119 Yong-Villalobos, L., González-Morales, S.I., Wrobel, K., Gutiérrez-Alanis, D., Cervantes-Peréz, S.A., Hayano-Kanashiro, C. et al. (2015) Methylome analysis reveals an important role for epigenetic changes in the regulation of the *Arabidopsis* response to phosphate starvation. *Proc. Natl. Acad. Sci. U.S.A.* **112**, E7293–E7302, <https://doi.org/10.1073/pnas.1522301112>
- 120 Le, T.-N., Schumann, U., Smith, N.A., Tiwari, S., Au, P.C.K., Zhu, Q.-H. et al. (2014) DNA demethylases target promoter transposable elements to positively regulate stress responsive genes in *Arabidopsis*. *Genome Biol.* **15**, 458, <https://doi.org/10.1186/s13059-014-0458-3>
- 121 Secco, D., Wang, C., Shou, H., Schultz, M.D., Chiarenza, S., Nussbaum, L. et al. (2015) Stress induced gene expression drives transient DNA methylation changes at adjacent repetitive elements. *eLife* **4**, <https://doi.org/10.7554/eLife.09343>
- 122 Luna, E. and Ton, J. (2012) The epigenetic machinery controlling transgenerational systemic acquired resistance. *Plant Signal. Behav.* **7**, 615–618, <https://doi.org/10.4161/psb.20155>
- 123 Slaughter, A., Daniel, X., Flors, V., Luna, E., Hohn, B., Mauch-Mani, B. et al. (2012) Descendants of primed *Arabidopsis* plants exhibit resistance to biotic stress. *Plant Physiol.* **158**, 835–843, <https://doi.org/10.1104/pp.111.191593>
- 124 Furci, L., Jain, R., Stassen, J., Berkowitz, O., Whelan, J., Roquis, D. et al. (2019) Identification and characterisation of hypomethylated DNA loci controlling quantitative resistance in *Arabidopsis*. *eLife* **8**, e40655, <https://doi.org/10.7554/eLife.40655>
- 125 Kenchanmane Raju, S.K., Shao, M.-R., Wamboldt, Y. and Mackenzie, S. (2018) Epigenomic plasticity of *Arabidopsis* msh1 mutants under prolonged cold stress. *Plant Direct* **2**, e00079, <https://doi.org/10.1002/pld3.79>
- 126 Paszkowski, J. and Grossniklaus, U. (2011) Selected aspects of transgenerational epigenetic inheritance and resetting in plants. *Curr. Opin. Plant Biol.* **14**, 195–203, <https://doi.org/10.1016/j.pbi.2011.01.002>



- 127 Ganguly, D.R., Crisp, P.A., Eichten, S.R. and Pogson, B.J. (2017) The Arabidopsis DNA methylome is stable under transgenerational drought stress. *Plant Physiol.* **175**, 1893–1912, <https://doi.org/10.1104/pp.17.00744>
- 128 Wibowo, A., Becker, C., Marconi, G., Durr, J., Price, J., Hagmann, J. et al. (2016) Hyperosmotic stress memory in Arabidopsis is mediated by distinct epigenetically labile sites in the genome and is restricted in the male germline by DNA glycosylase activity. *Elife* **5**, e13546, <https://doi.org/10.7554/eLife.13546>
- 129 Van Dooren, T., Silveira, A., Gilbert, E., Jimenez-Gomez, J.M., Martin, A., Bach, L. et al. Mild drought induces phenotypic and DNA methylation plasticity but no transgenerational effects in Arabidopsis. *bioRxiv*, <https://doi.org/10.1101/370320>
- 130 Iwasaki, M. and Paszkowski, J. (2014) Identification of genes preventing transgenerational transmission of stress-induced epigenetic states. *Proc. Natl. Acad. Sci. U.S.A.* **111**, 8547–8552, <https://doi.org/10.1073/pnas.1402275111>
- 131 Dubin, M.J., Zhang, P., Meng, D., Remigereau, M.-S., Osborne, E.J., Casale, F.P. et al. (2015) DNA methylation in Arabidopsis has a genetic basis and shows evidence of local adaptation. *eLife* **4**, e05255, <https://doi.org/10.7554/eLife.05255>
- 132 Kawakatsu, T., Huang, S.-S.C., Jupe, F., Sasaki, E., Schmitz, R.J., Urich, M.A. et al. (2016) Epigenomic diversity in a global collection of Arabidopsis thaliana accessions. *Cell* **166**, 492–505, <https://doi.org/10.1016/j.cell.2016.06.044>
- 133 Niederhuth, C.E., Bewick, A.J., Ji, L., Alabady, M.S., Kim, K.D., Li, Q. et al. (2016) Widespread natural variation of DNA methylation within angiosperms. *Genome Biol.* **17**, 194, <https://doi.org/10.1186/s13059-016-1059-0>
- 134 Takuno, S., Ran, J.-H. and Gaut, B.S. (2016) Evolutionary patterns of genic DNA methylation vary across land plants. *Nat. Plants* **2**, 15222, <https://doi.org/10.1038/nplants.2015.222>
- 135 Feng, S., Jacobsen, S.E. and Reik, W. (2010) Epigenetic reprogramming in plant and animal development. *Science* **330**, 622–627, <https://doi.org/10.1126/science.1190614>
- 136 Zhang, Y., Jake Harris, C., Liu, Q., Liu, W., Ausin, I., Long, Y. et al. (2018) Large-scale comparative epigenomics reveals hierarchical regulation of non-CG methylation in Arabidopsis. *Proc. Natl. Acad. Sci. U.S.A.* **115**, E1069–E1074, <https://doi.org/10.1073/pnas.1716300115>
- 137 Shema, E., Bernstein, B.E. and Buenrostro, J.D. (2019) Single-cell and single-molecule epigenomics to uncover genome regulation at unprecedented resolution. *Nat. Genet.* **51**, 19–25, <https://doi.org/10.1038/s41588-018-0290-x>
- 138 Viridi, K.S., Laurie, J.D., Xu, Y.-Z., Yu, J., Shao, M.-R., Sanchez, R. et al. (2015) Arabidopsis MSH1 mutation alters the epigenome and produces heritable changes in plant growth. *Nat. Commun.* **6**, 6386, <https://doi.org/10.1038/ncomms7386>
- 139 Ji, L., Jordan, W.T., Shi, X., Hu, L., He, C., Schmitz, R.J. et al. (2018) TET-mediated epimutagenesis of the Arabidopsis thaliana methylome. *Nat. Commun.* **9**, 895, <https://doi.org/10.1038/s41467-018-03289-7>
- 140 Raju, S.K.K., Shao, M.-R., Sanchez, R., Xu, Y.-Z., Sandhu, A., Graef, G. et al. (2018) An epigenetic breeding system in soybean for increased yield and stability. *Plant Biotechnol. J.* **16**, 1836–1847, <https://doi.org/10.1111/pbi.12919>
- 141 Gallego-Bartolomé, J., Gardiner, J., Liu, W., Papikian, A., Ghoshal, B., Kuo, H.Y. et al. (2018) Targeted DNA demethylation of the genome using the human TET1 catalytic domain. *Proc. Natl. Acad. Sci. U.S.A.* **115**, E2125–E2134, <https://doi.org/10.1073/pnas.1716945115>
